# Supplementary material for: Abnormal RasGRP1 Expression in the Post-Mortem Brain and Blood Serum of Schizophrenia Patients
Source: MDPI journal article supplement (doi:10.3390/biom12020328), 2022-02-18
Supplement: s1 [file s1]

Supplemental Information for

## Abnormal RasGRP1 expression in the post-mortem brain and blood serum of schizophrenia patients.

Arianna De Rosa<sup>1,#</sup>, Anna Di Maio<sup>1,#</sup>, Silvia Torretta<sup>2</sup>, Martina Garofalo<sup>1,3</sup>, Valentina Giorgelli<sup>2</sup>, Rita Masellis<sup>2</sup>, Tommaso Nuzzo<sup>1,3</sup>, Francesco Errico<sup>1,5</sup>, Alessandro Bertolino<sup>2,5</sup>, Srinivasa Subramaniam<sup>6</sup>, Antonio Rampino<sup>2,5,\*</sup> and Alessandro Usiello<sup>1,3,\*</sup>

<sup>1</sup> Laboratory of Translational Neuroscience, CEINGE Biotecnologie Avanzate, 80145, Naples, Italy, [derosaar@ceinge.unina.it](mailto:derosaar@ceinge.unina.it) (A.D.R.); [dimaio@ceinge.unina.it](mailto:dimaio@ceinge.unina.it) (A.D.M.); [garofalom@ceinge.unina.it](mailto:garofalom@ceinge.unina.it) (M.G.); [nuzzo@ceinge.unina.it](mailto:nuzzo@ceinge.unina.it) (T.N.); [erricof@ceinge.unina.it](mailto:erricof@ceinge.unina.it) (F.E.)

<sup>2</sup> Group of Psychiatric Neuroscience, Department of Basic Medical Sciences, Neuroscience and Sense Organs, University of Bari Aldo Moro, 70124, Bari, Italy, [silvia.torretta@uniba.it](mailto:silvia.torretta@uniba.it) (S.T.), [valegio3@gmail.com](mailto:valegio3@gmail.com) (V.G.); [rita.masellis@uniba.it](mailto:rita.masellis@uniba.it) (R.M.); [antonio.rampino@uniba.it](mailto:antonio.rampino@uniba.it) (A.R.)

<sup>3</sup> Department of Environmental, Biological and Pharmaceutical Science and Technologies, Università degli Studi della Campania "Luigi Vanvitelli", 81100, Caserta, Italy; [usiello@ceinge.unina.it](mailto:usiello@ceinge.unina.it) (A.U.)

<sup>4</sup> Department of Agricultural Sciences, University of Naples "Federico II", Naples, Italy; [francesco.errico@unina.it](mailto:francesco.errico@unina.it) (F.E.)

<sup>5</sup> Azienda Ospedaliero-Universitaria Consorziale Policlinico, 70124, Bari, Italy; [alessandro.bertolino@uniba.it](mailto:alessandro.bertolino@uniba.it) (A.B.)

<sup>6</sup> Department of Neuroscience, The Scripps Research Institute, Florida, Jupiter, Florida, 33458, USA.; [SSubrama@scripps.edu](mailto:SSubrama@scripps.edu), (S.S)

# Share the Co-First authorship

\* Correspondence: [usiello@ceinge.unina.it](mailto:usiello@ceinge.unina.it); Tel.: +39-0813737899 (A.U.); [antonio.rampino@uniba.it](mailto:antonio.rampino@uniba.it); Tel.: +39 080 5478588 (A.R.)

**Table S1.** Demographic characteristics, comorbidities, clinical diagnosis of each control subject and schizophrenia patient.

| Control |     |             |             |      |                                                                                      | Schizophrenia |     |             |             |      |                                                                                               |
|---------|-----|-------------|-------------|------|--------------------------------------------------------------------------------------|---------------|-----|-------------|-------------|------|-----------------------------------------------------------------------------------------------|
| ID      | Sex | Age (years) | PMI (hours) | pH   | Clinical Diagnosis                                                                   | ID            | Sex | Age (years) | PMI (hours) | pH   | Antipsychotic medication                                                                      |
| 1       | M   | 47          | 12.5        | 6.53 | CA (esophagus) with metastases to the liver                                          | 21            | M   | 46          | 21.7        | 6.45 | Schizophrenia, Depression, Bipolar, Seizure disorder, Epilepsy, Substance abuse               |
| 2       | M   | 66          | 17.3        | 6.49 | CA (lung), COPD                                                                      | 22            | M   | 55          | 10.7        | N.A. | Schizophrenia, Suicide, Overdose, Depression, Anxiety, Hypochondriasis                        |
| 3       | F   | 92          | 23.3        | 6.75 | CA (uterus, stomach), Congestive heart failure, Hypertension, Macular degeneration,  | 23            | M   | 53          | 20.5        | N.A. | Schizophrenia, Depression, Bipolar, CA (lung) Paranoia, Psychosis, Hypertension, Anxiety      |
| 4       | M   | 84          | 11.8        | 6.79 | CA (stomach), Renal failure, acute, COPD                                             | 24            | M   | 70          | 24.0        | 6.56 | Schizophrenia, Paranoia, Aggressive behavior, Dementia, Impulse disorder, Tuberculosis        |
| 5       | M   | 70          | 11.8        | 6.62 | Coronary heart disease, Leukemia, Type I diabetes, Myocardial infarction, Congestive | 25            | M   | 35          | 35.7        | 6.51 | Schizophrenia, Alcohol abuse                                                                  |
| 6       | M   | 87          | 9.3         | 6.76 | Congestive heart failure, Atherosclerosis, COPD                                      | 26            | F   | 32          | 12.3        | 6.51 | Schizophrenia, Alcohol abuse history                                                          |
| 7       | M   | 58          | 9.0         | 6.32 | CA (colon)                                                                           | 27            | M   | 61          | 28.0        | 6.73 | Schizophrenia, Aggressive behavior, Suicide, Attempts, Anxiety, Tobacco abuse, Asthma         |
| 8       | M   | 68          | 10.5        | N.A. | CA (lung), Alcohol abuse, Type I diabetes, Transient Ischemic Attack                 | 28            | F   | 41          | 20.8        | 6.39 | Schizophrenia, Suicide, Stabbing, Psychosis, Disassociated Disorders, Electroconvulsive       |
| 9       | M   | 80          | 14.0        | 6.49 | CA (bladder), Hypertension, Diabetes type II, CVA                                    | 29            | F   | 50          | 13.7        | N.A. | Schizophrenia, Suicide, Overdose, Aggressive behavior, Depression, Migraine, Hallucination    |
| 10      | M   | 76          | 16.0        | 6.55 | CA (lung). Pulmonary emphysema                                                       | 30            | M   | 18          | 26.3        | 6.72 | Schizophrenia, Mentally retarded (clinical only), Attention Deficit Disorder, Sleep Apnea     |
| 11      | M   | 75          | 11.5        | 6.6  | CA (prostate) Coronary heart disease, Hypertension                                   | 31            | M   | 46          | 11.6        | 6.41 | Schizophrenia, Suicide, hanging, Alcohol abuse, Substance abuse (not Alcohol), Depression     |
| 12      | M   | 66          | 13.3        | N.A. | CA (larynx) Metastasis to bone and liver, Type I diabetes                            | 32            | F   | 29          | 27.3        | 6.4  | Schizophrenia, Depression, Seizure Disorder, Attention Deficit Disorder, Aggressive behavior  |
| 13      | M   | 64          | 17.5        | 6.63 | Lymphoma, Coronary Artery Disease                                                    | 33            | M   | 60          | 10.3        | N.A. | Schizophrenia, Depression, Bipolar, Alcohol abuse, Psychotic disorder, Inappropriate sexual   |
| 14      | M   | 80          | 12.0        | N.A. | CA (kidney) Hypertension, Atrial fibrillation, Macular degeneration, COPD            | 34            | F   | 75          | 14.9        | N.A. | Schizophrenia, CA (pancreas), Dementia, Therapeutic lobotomy, Dysphagia                       |
| 15      | F   | 83          | 17.6        | 6.41 | CA (breast, uterus, colon), Macular degeneration, Chronic urinary tract infection    | 35            | F   | 77          | 14.7        | 6.38 | Schizophrenia, Alcohol abuse, Depression, Bipolar and Seizure disorder                        |
| 16      | F   | 79          | 14.0        | N.A. | Coronary heart disease, Hypertension                                                 | 36            | M   | 77          | 26.5        | 6.56 | Schizophrenia, Hypertension, Dementia, COPD                                                   |
| 17      | M   | 61          | 19.5        | 6.29 | Normal                                                                               | 37            | M   | 24          | 12.8        | 6.47 | Schizophrenia, Depression, Substance abuse (not Alcohol), Suicide Attempts, Alcohol abuse     |
| 18      | M   | 70          | 12.0        | N.A. | Renal failure, acute, Diabetes type I                                                | 38            | F   | 62          | 12.2        | 6.67 | Schizophrenia, Stroke/CVA, Depression, Hypertension, Diabetes type I                          |
| 19      | M   | 72          | 12.2        | 6.54 | COPD, Pulmonary emphysema                                                            | 39            | F   | 52          | 15.6        | 6.49 | Schizophrenia, Depression, CA (pancreas), Diabetes Type II, Hypothyroidism, Hypertension      |
| 20      | F   | 81          | 14.5        | N.A. | COPD, Pneumonia, Osteoporosis, Tuberculosis                                          | 40            | M   | 55          | 12.6        | N.A. | Schizophrenia, Paranoid Schizophrenia, Infection Bacterial, Psychotic disorder, Hallucination |

**Abbreviations:** ID: Identifier (progressive) number for each recruited subject; PMI: post-mortem interval; M: male; F: female; CA: carcinoma; COPD: chronic obstructive pulmonary disease; CVA: cerebrovascular accident; N.A.: Not Available.
